# Supplementary material
Source: PubMed Central journal article supplement (PMC3414902)
Supplement: mmc1.pdf [file mmc1.pdf]

# **Lipid Loading of Human Vascular Smooth Muscle Cells Induces Changes in Tropoelastin Protein Levels and Physical Structure**

Valerie Samouillan,<sup>†</sup> Jany Dandurand,<sup>†</sup> Laura Nasarre,<sup>‡</sup> Lina Badimon,<sup>‡</sup> Colette Lacabanne,<sup>†</sup> and Vicenta Llorente-Cortés<sup>‡</sup>

<sup>†</sup>Physique des Polymères, Institut Carnot, CIRIMAT UMR 5085, Université Paul Sabatier, Toulouse, France; and <sup>‡</sup>Cardiovascular Research Center, CSIC-ICCC, IIB-Sant Pau, Hospital de la Santa Creu i Sant Pau, Barcelona, Spain

## Supporting Material

### Fourier Transform Infrared analysis (FTIR)

Fourier transform infrared spectroscopy/attenuated total reflectance (FTIR/ATR) spectra were collected using a Nicolet 5700 FTIR (THERMO FISHER SCIENTIFIC, Waltham, MA) equipped in ATR device equipped with a KBr beam splitter and a MCT/B detector. Spectra were recorded over the region of 4000–450  $\text{cm}^{-1}$  with a spectral resolution of 4  $\text{cm}^{-1}$  and 64 accumulations. The ATR accessory used was a Smart Orbit equipped with a type IIA diamond crystal (refractive index 2.4). A single-beam background spectrum was collected from the clean diamond crystal before each experiment and this background was subtracted from the spectra. Fourier-Self-Deconvolution (FSD) of the infrared spectra that allows resolution of several overlapping bands was performed in the amide I/II region using Omnic software (THERMO FISHER SCIENTIFIC, Waltham, MA). The linear baseline correction was made on the FSD trace, and the decomposition of the amide I/II bands on the FSD trace was then performed with a Gaussian curve fitting procedure.

### Thermogravimetric Analysis (TGA)

Analyses were performed in alumina pans, with an initial mass of 7mg, between 25 and 650°C at 10°C/min under  $\text{N}_2$  atmosphere using a TGA Q50 (TA INSTRUMENTS, New Castle, DE).

### Differential Scanning Calorimetry (DSC)

Analyses were performed using a DSC Pyris calorimeter (PERKIN ELMER, Waltham, MA) The calorimeter was calibrated at low temperatures using Hg and In as standards, resulting in a temperature accuracy of  $\pm 0.1^\circ\text{C}$  and an enthalpy accuracy of  $\pm 0.2$  J/g. Samples, 10 mg in weight, were set into aluminium pans and equilibrated at the initial temperature during 5 minutes before heating at 20°C/min.

### Dynamic Dielectric spectrometry (DDS)

The dielectric measurements were performed using a broad-band dielectric spectrometer BDS 4000 system (NOVOCONTROL TECHNOLOGIES GmbH & Co. KG, Hundsangen, Germany). Samples were kept in a special cell usually devoted to biological samples consisting of two stainless steel electrodes surrounded by a Teflon ring. The diameter of the electrodes was 15 mm, and the thickness of the samples was 0.1 mm (powdered sample, gently compressed).

Isothermal measurements of the complex dielectric function  $\epsilon^* = \epsilon' - i\epsilon''$  were performed at every fifth degree, with an isothermal stability of  $\pm 0.1^\circ\text{C}$ , from -145 to 100°C in the frequency range  $10^{-2}$  to  $3 \cdot 10^6$  after a first heating at 100°C to dehydrate the sample. The experimental limit for the loss factor ( $\tan\delta = \epsilon''/\epsilon'$ ) was about  $10^{-4}$ .

## TABLES

| Band position ( $\text{cm}^{-1}$ ) |                             | Tentative of assignment                                  |
|------------------------------------|-----------------------------|----------------------------------------------------------|
| Supernatant from control VSMC      | Supernatant from agLDL-VSMC |                                                          |
| 3446, 3361, 3197                   | 3347, 3361                  | amide A H-bonded $\nu(\text{O-H})$ and $\nu(\text{N-H})$ |
| 2955, 2922, 2850, 2827             | 2948, 2821                  | $\nu(\text{C-H})$ aliphatic                              |

|            |            |                                                                    |
|------------|------------|--------------------------------------------------------------------|
| 1651, 1632 | 1652, 1633 | amide Iv(C=O)                                                      |
| 1591       | 1588       | $\nu$ (C-C) ring Tyr, Phe                                          |
| 1548       | 1548       | amide II $\nu$ (CN), $\delta$ (NH)                                 |
| 1464-1452  | 1464-1452  | $\delta$ (CH <sub>2</sub> ,CH <sub>3</sub> ) aliphatic side chains |
| 1408       | 1408       | $\nu$ (COO-)                                                       |
| 1224       | 1235       | amide III $\delta_{\text{plan}}$ (N-H)                             |
| 1206       | 1205       | $\delta$ (COH)Tyr                                                  |
| 1178       | 1187       | $\gamma$ (CH <sub>2</sub> ) Pro, Tyr                               |
| 1039       | 1039       | $\nu$ (C-C), $\nu$ (C-O), Phe, Ser                                 |
| 930        | 930        | $\nu$ (C $\alpha$ -C) characteristic of $\alpha$ -helices.         |
| 530        | 530        | $\nu$ (S-S)                                                        |

**Table S1: FTIR bands assignment of supernatants fractions**

| Band position (cm <sup>-1</sup> ) | assignment                                                                                               |
|-----------------------------------|----------------------------------------------------------------------------------------------------------|
| <b>agLDL</b>                      |                                                                                                          |
| 3450-3000                         | $\nu$ (O-H) of bound water                                                                               |
| 2958, 2927, 2854                  | asymmetric and symmetric methyl and methylene stretching                                                 |
| 1734                              | $\nu$ (C=O) of ester bond                                                                                |
| 1645                              | amide I $\nu$ (C=O)                                                                                      |
| 1539                              | amide II $\nu$ (CN), $\delta$ (NH)                                                                       |
| 1464                              | $\delta$ (CH <sub>2</sub> ) (scissoring) in acyl chains                                                  |
| 1378                              | $\delta_s$ (CH <sub>3</sub> ) (bending), $\delta$ (CH <sub>2</sub> ) (wagging)                           |
| 1241                              | P=O stretching                                                                                           |
| 1063                              | ester C-O-C symmetric stretching                                                                         |
| 969                               | N <sup>+</sup> (CH <sub>3</sub> ) <sub>3</sub> asymmetric stretching from choline group in phospholipids |

**Table S2: FTIR bands assignment of agLDL**

| Supernatant       | 1 <sup>st</sup> stage (25-150°C) |                       |                       | 2 <sup>nd</sup> stage (150-450°C) |                       |                       |
|-------------------|----------------------------------|-----------------------|-----------------------|-----------------------------------|-----------------------|-----------------------|
|                   | $\Delta m$ (%)                   | T <sub>max</sub> (°C) | T <sub>max</sub> (°C) | $\Delta m$ (%)                    | T <sub>max</sub> (°C) | T <sub>max</sub> (°C) |
| From control VSMC | 8.2                              | 56                    | 100-130               | 26.5                              | 301                   | 335                   |
| From agLDL-VSMC   | 6.4                              | 56                    | 126                   | 29.6                              | 292                   | 332                   |

**Table S3: Thermal parameters of purified supernatants (from control and agLDL loaded VSMC).**
